# Supplementary material
Source: PubMed Central journal article supplement (PMC3346387)
Supplement: supp_78.11.4008_AEM-AEM00165-12-s01.pdf [file supp_78.11.4008_AEM-AEM00165-12-s01.pdf]

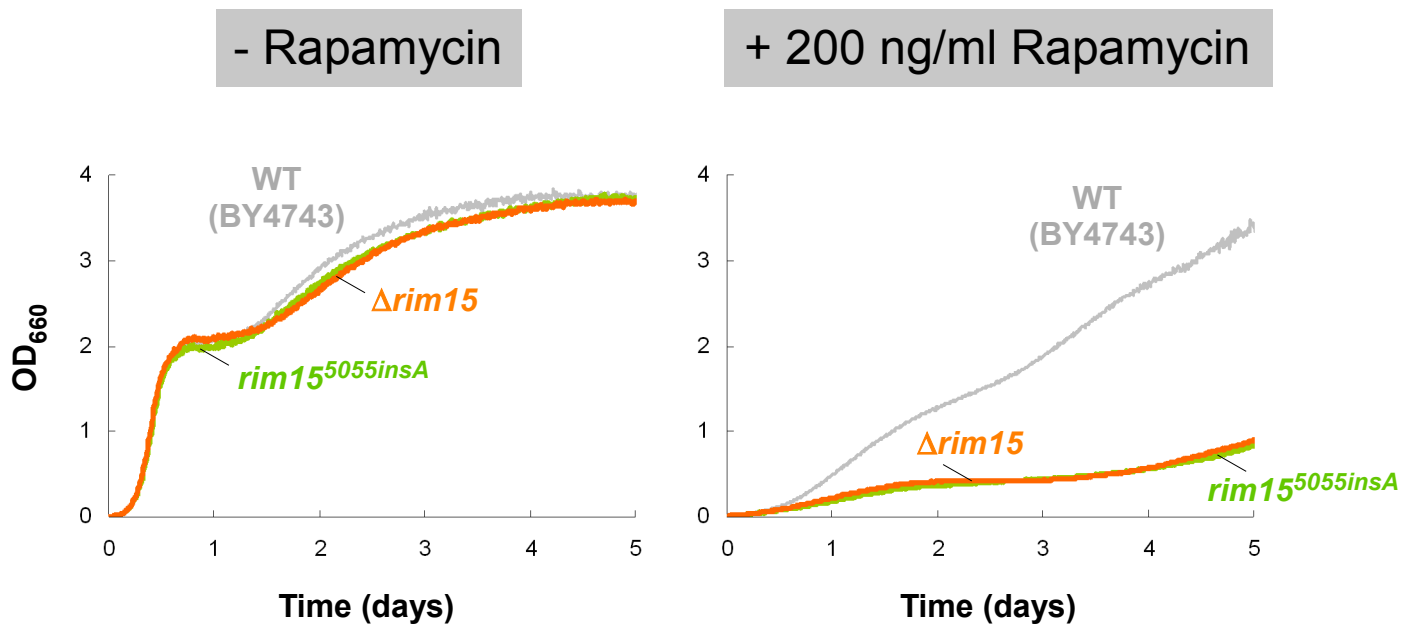

**FIG S1.** Growth phenotypes of the wild type and *rim15* mutant strains in the presence and absence of rapamycin. Wild-type BY4743 (gray line),  $\Delta rim15$  (orange line), and  $rim15^{5055insA}$  mutant (green line) strains were grown for 5 days in YPD medium (left) and YPD medium containing 200 ng/ml rapamycin (right). The optical density at 660 nm ( $OD_{660}$ ) was automatically measured using a bio-photorecorder TVS062CA (Advantec Toyo, Japan).
